# Supplementary material for: Antibody-dependent cellular cytotoxicity responses and susceptibility influence HIV-1 mother-to-child transmission
Source: PubMed Central journal article supplement (PMC9090239; doi:10.1172/jci.insight.159435), 2022-05-09
Supplement: jciinsight-7-159435-s070.pdf [file jciinsight-7-159435-s070.pdf]

**Supplementary Table 1. Demographics of matched transmitting and non-transmitting mother infant pairs.**

|                                                                     | <b>TM/HEI</b>    | <b>NTM/HEU</b>   |
|---------------------------------------------------------------------|------------------|------------------|
| <b>Number of dyads</b>                                              | 21               | 42               |
| <b>Median mother age in years (range)</b>                           | 26 (18-36)       | 25 (17-36)       |
| <b>Median mother log<sub>10</sub> plasma virus level (range)</b>    | 4.78 (3.32-5.80) | 4.67 (1.59-5.99) |
| <b>Median mother CD4 T cells (cells / ml) (range)</b>               | 336 (210-1092)   | 339 (240-1145)   |
| <b>Median # of days from birth to sample analyzed (range)</b>       | 43 (1-256)       | 42.5 (12-297)    |
| <b>Infant age in days at 1<sup>st</sup> positive HIV-1 PCR test</b> | 83 (42-293)      | N/A              |
| <b>Infant # females (%)</b>                                         | 6 (28.6)         | 16 (38.1)        |

TM: transmitting mother; HEI: HIV-1 exposed infected; NTM: non-transmitting mother; HEU: HIV-1 exposed uninfected; N/A: Not applicable

For infant ID 99, there was insufficient sample for analysis of ADCC breadth and potency

Three mother samples were collected within 7 days after delivery. In these 3 cases, IgG was isolated from the sample for the neutralization and ADCC analysis.

One infant sample was collected within 7 days after birth. In this case, IgG was isolated from the sample for the neutralization and ADCC assay.

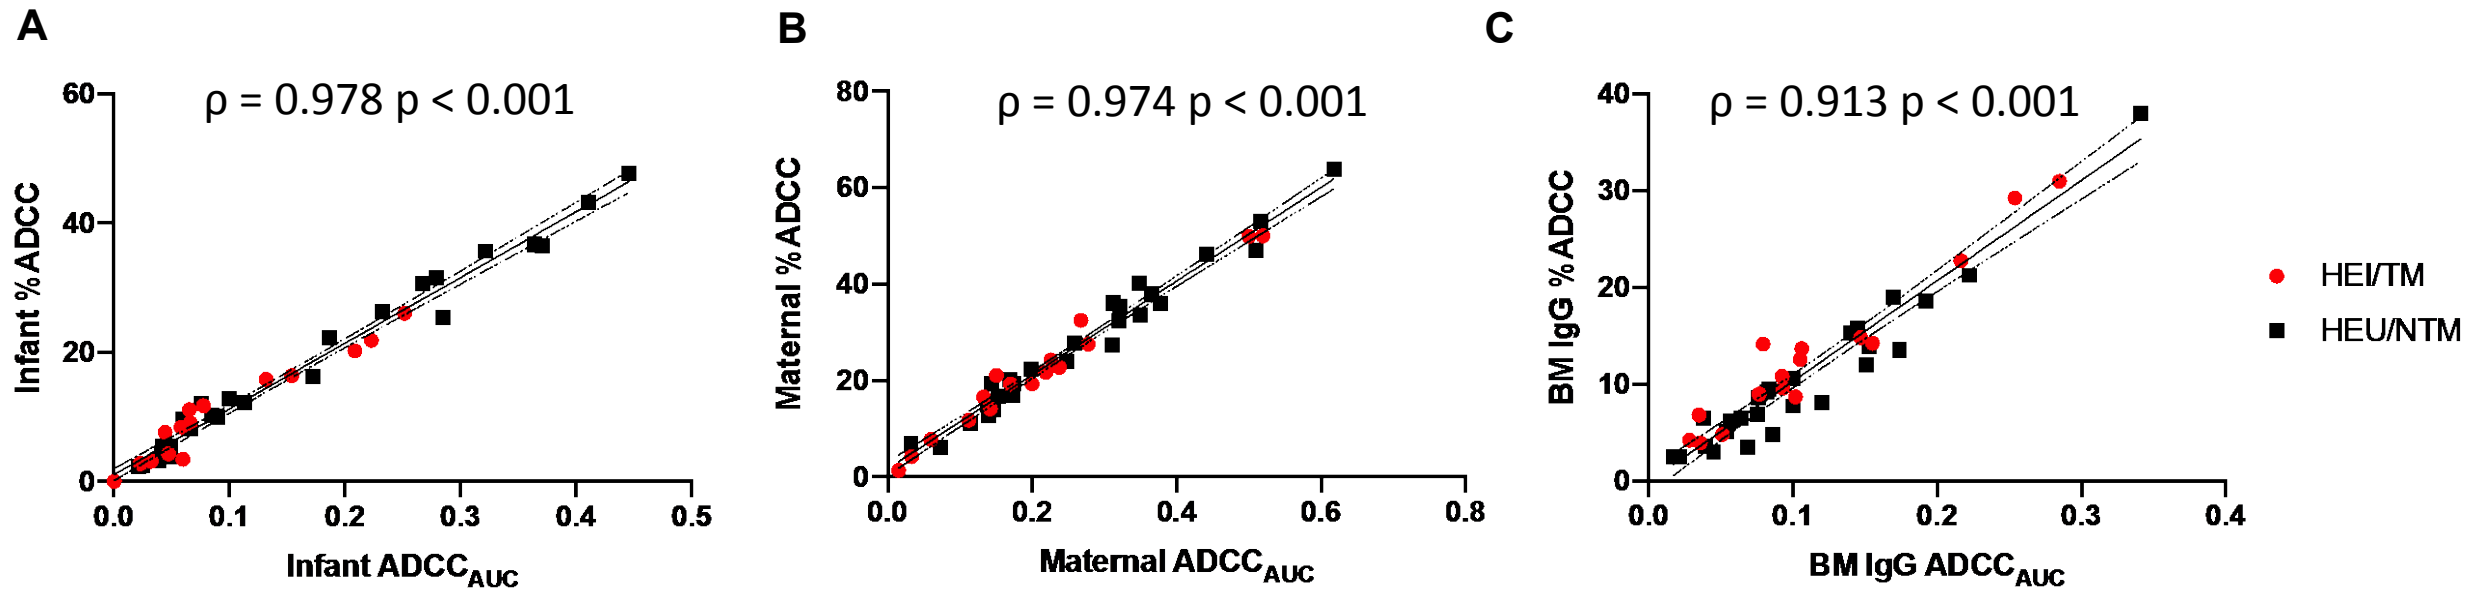

**Supplementary Figure 1. Area under the curve (AUC) and Percent ADCC.** ADCC measurements using area under the curve (ADCC<sub>AUC</sub>) were compared to measurements of percent ADCC at the top dilution tested (1:50) in infant plasma (A), maternal plasma (B), and BM IgG (C). The red and black dots indicate TMs/ HEI and NTMs/ HEU infants respectively. Correlations were assessed using Spearman's statistic. Line indicates linear regression fit with 95% confidence interval.

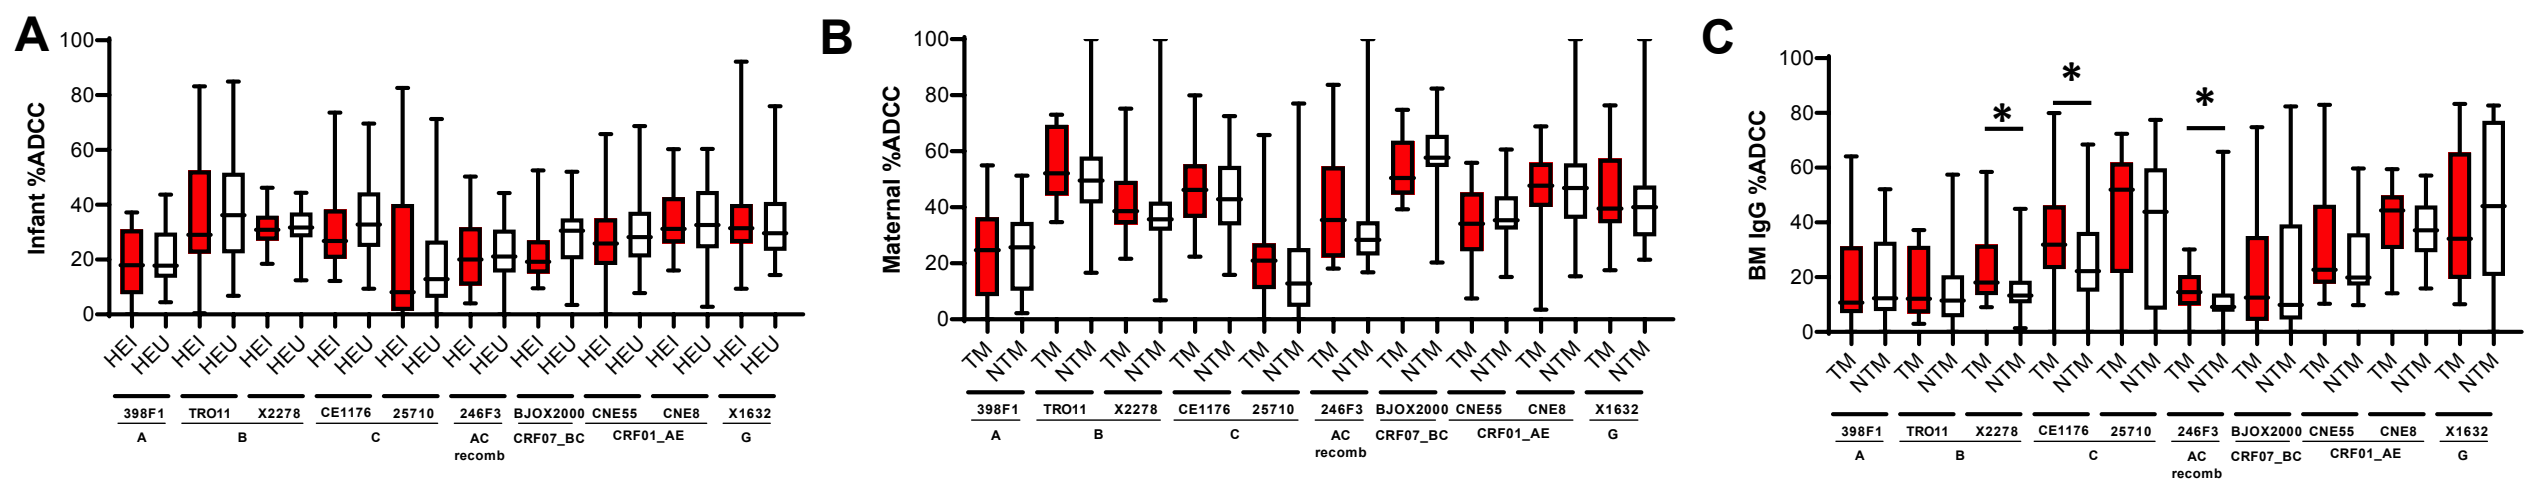

**Supplementary Figure 2. Percent ADCC against 10 different Env variants.** Percent ADCC measurements at the top dilution tested (1:50) in infant plasma (A), maternal plasma (B), and BM IgG (C) against 10 different variants. The red and black dots indicate TMs/ HEI and NTMs/ HEU respectively. The virus Env ID and subtype are identified on the bottom. Comparisons were done using Wilcoxon rank-sum test. \* indicates  $p < 0.05$  without accounting for multiple comparisons.

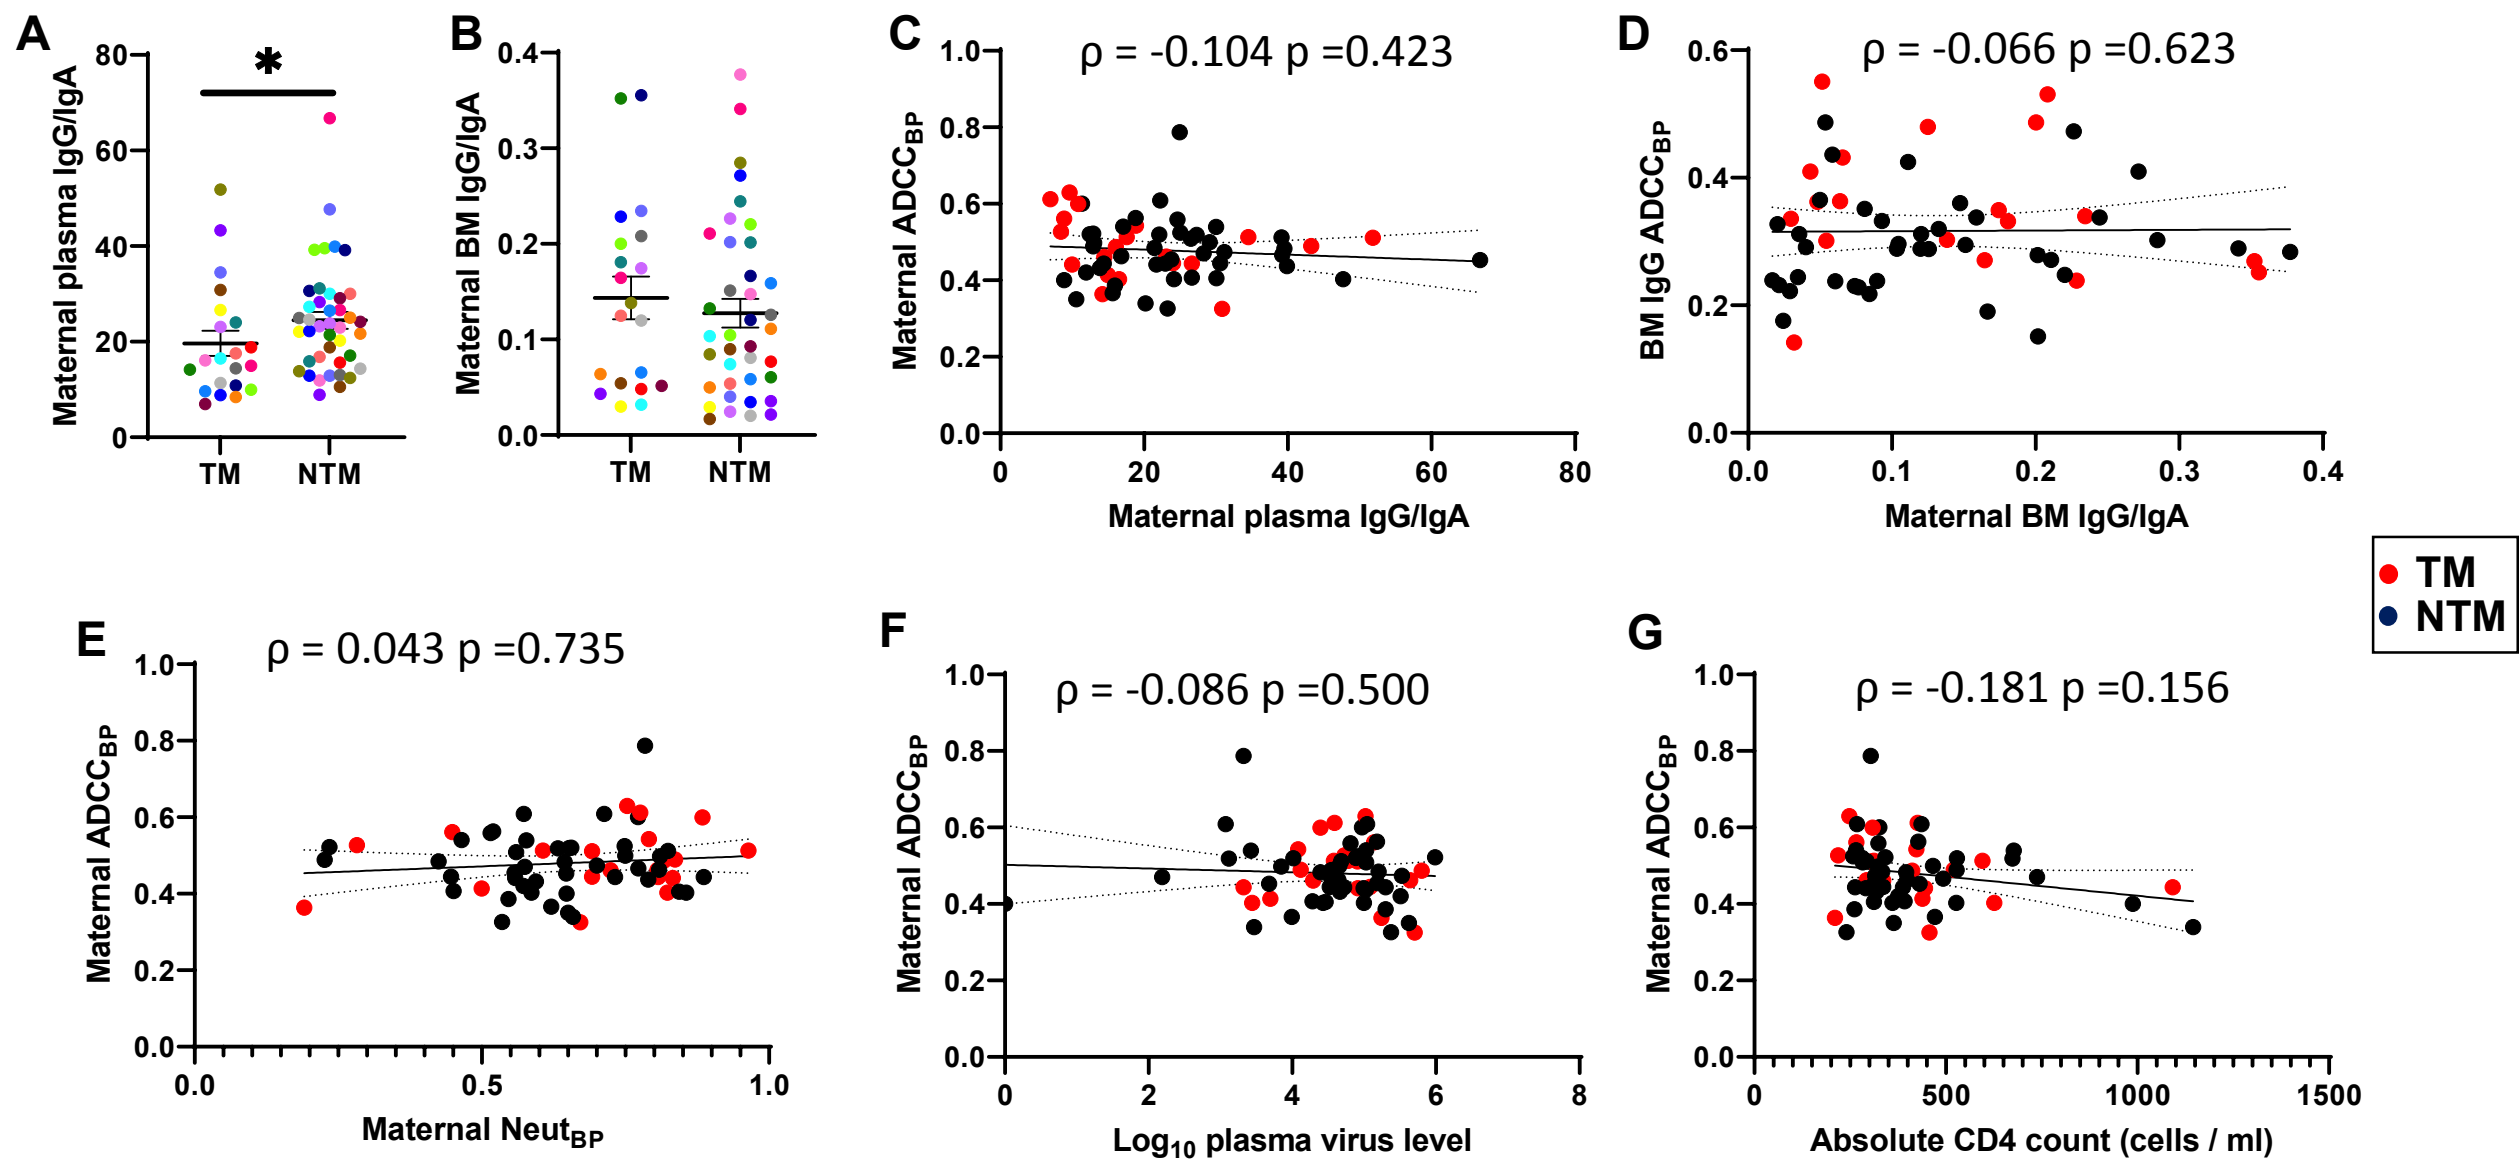

**Supplementary Figure 3. Maternal IgG/IgA ratio and correlations among maternal factors.** IgG/IgA ratios in TMs and NTMs plasma (A) and breastmilk (BM) (B). Colors indicate matched pairs. \* indicates  $p \leq 0.05$ . Correlations (C – G) among maternal characteristics denoted on the x and y-axis. The red and black dots indicate TMs and NTMs respectively. Correlations were assessed using Spearman’s statistic. Line indicates linear regression fit with 95% confidence interval.
